# Supplementary material
Source: HighWire-hosted journal article supplement (https://www.cmajopen.ca/highwire/filestream/81382/field_highwire_adjunct_files/1/2019-0049-original-submission.pdf)
Supplement: 2019-0049-original-submission.pdf [file 2019-0049-original-submission.pdf]

1  
2  
3 **TITLE: Missed opportunities to promote tobacco control, physical activity and**  
4 **healthy eating? A systematic assessment of Canadian laws**  
5

6 **SHORT TITLE: Health behaviour laws in Canada**  
7

8  
9 **AUTHORS:** Katerina Maximova, PhD<sup>a</sup>; Kim D. Raine, PhD<sup>a</sup>; Christine Czoli, PhD<sup>b</sup>; Jennifer  
10 O'Loughlin, PhD<sup>c</sup>; John Minkley, JD<sup>d</sup>; Tania Bubela, PhD, JD<sup>e</sup>  
11

12 **INSTITUTIONAL AFFILIATIONS:**

- 13 a School of Public Health, University of Alberta, Edmonton, AB  
14 b School of Epidemiology and Public Health, University of Ottawa, Ottawa, ON  
15 c School of Public Health, University of Montreal, Montreal, QC  
16 d Faculty of Law, University of Alberta, Edmonton, AB  
17 e Faculty of Health Sciences, Simon Fraser University, Vancouver, BC  
18  
19

20 **CORRESPONDING AUTHOR:** Katerina Maximova, PhD  
21 School of Public Health, University of Alberta,  
22 3-268 Edmonton Clinic Health Academy  
23 Edmonton, AB, T6G 2T4, CANADA  
24 Tel: 1-780-248-2076; Fax: 1-780-492-8934  
25 email: katerina.maximova@ualberta.ca  
26  
27

28 **WORD COUNT:**

29 Abstract: 250 (max 250)  
30 Text: 2398, excluding references, tables and figures (max 2500)  
31 Tables: 4  
32 Figure: 1  
33 References: 35  
34  
35

36 **KEYWORDS:** chronic disease prevention, legal intervention, tobacco use, physical  
37 activity, healthy eating  
38  
39

40 **ACKNOWLEDGEMENTS:**

41 This work was funded by a Career Development Award in Prevention Research from the  
42 Canadian Cancer Society to Katerina Maximova (grant #702936). Sholeh Rahman and Natalia  
43 Fedkina assisted with data coding and analysis. All interpretations and opinions in the present  
44 study are those of the authors.  
45

46 **CONFLICT OF INTEREST:** None declared.  
47  
48

49 **COMPETING INTERESTS:** None declared.  
50  
51  
52  
53  
54  
55  
56  
57  
58  
59  
60

## ABSTRACT

**Background:** Legal interventions are important mechanisms for chronic disease prevention (CDP). Unlike tobacco control legislation, Canadian laws to promote physical activity and healthy eating have not been systematically assessed.

**Methods:** Using the CPAC Prevention Policies Directory, we identified 786 federal and provincial laws targeting tobacco use, physical activity and healthy eating. We systematically characterized the legislation with regard to its purpose, tools to accomplish the purpose, responsible authorities, target location, level of coerciveness, and provisions for enforcement.

**Results:** Two-thirds of tobacco control legislation had a primary CDP purpose (6% explicit; 63% implicit) and 29% had a secondary CDP purpose. One-third of physical activity legislation had a primary CDP purpose (8% explicit; 22% implicit) and 50% had a secondary CDP purpose. In contrast, 62% of healthy eating legislation had no CDP purpose. Tobacco control legislation was most coercive (restrict/eliminate choice), while physical activity and healthy eating legislation was least coercive (provide information/enable choice). Most (84%) tobacco control legislation included provisions for enforcement, while 43% and 21% of physical activity and healthy eating laws, respectively, included such provisions. Patterns in responsible authorities, target populations, settings, and tools to accomplish its purpose (e.g., taxation, subsidies, advertising limits, prohibitions) also differed between legislation targeting tobacco control vs. physical activity and healthy eating.

**Interpretation:** Compared with tobacco control, stronger legislative approaches to promote physical activity and healthy eating lag behind. Results serve as a baseline for building consensus on the use of legislation to support CDP approaches to reduce the chronic disease burden among Canadians.

## INTRODUCTION

Legislative and regulatory approaches have emerged as important mechanisms for chronic disease prevention (CDP), whereby governments use law as a tool to create health-supporting environments that enable behaviour change.<sup>1-3</sup> Growing evidence demonstrates public health impact of legal interventions such as taxation and subsidies; appropriate packaging, labelling and composition standards; and marketing restrictions as key cost-effective components within a comprehensive CDP strategy.<sup>4-7</sup> At the United Nations High-level Meeting on noncommunicable diseases in September 2018, Canada along with other governments reaffirmed its commitment to urgent implementation of robust legislative and regulatory measures targeting key lifestyle behaviours,<sup>8</sup> to support action on reducing the escalating burden of chronic disease.<sup>9</sup>

The enactment of appropriate legislation has been central to tobacco control in Canada and has led to considerable progress in curbing the prevalence of tobacco use.<sup>10</sup> The use of law is enshrined in the WHO Framework Convention on Tobacco Control (WHO FCTC), a legally binding treaty.<sup>11</sup> Building on lessons from tobacco control can help accelerate progress in the development of public regulations designed to promote physical activity and healthy eating.<sup>12-13</sup> In Canada, as in other jurisdictions, tobacco control policies have been extensively identified, described, and evaluated.<sup>14-18</sup> Legal interventions targeting physical activity and healthy eating are increasing,<sup>19-23</sup> with recent Canadian studies examining the effects of provincial food/beverage advertising ban on the quality and quantity of advertised products,<sup>24-26</sup> and the impact of provincial bans of junk food in schools on overweight and obesity in children.<sup>27</sup> The objective of this study was to systematically assess the characteristics of Canadian federal and provincial legislation targeting tobacco use, physical activity and healthy eating with regard to its purpose, tools to accomplish

1  
2  
3 the purpose, responsible authorities, target location, level of coerciveness, and provisions for  
4 enforcement.  
5  
6  
7  
8  
9

## 10 **METHODS**

11  
12 Developed and curated by the Canadian Partnership Against Cancer (CPAC), the Prevention  
13 Policies Directory (PPD) is a freely accessible, online, up-to-date inventory of policies and legal  
14 instruments related to modifiable risk factors for chronic disease, including tobacco use, built  
15 environment, physical activity, and nutrition.<sup>28</sup> Each document published online contains basic  
16 descriptive information (i.e., document type, title, geographic location, targeted risk factor, year)  
17 and provides a web link to the document on a government website or the Canadian Legal  
18 Information Institute (CanLII) (<http://canlii.org/>). We extracted federal and provincial legislation  
19 targeting tobacco use, physical activity or the built environment, and healthy eating that had been  
20 captured in the CPAC PPD database up to September 2017. We included statutes, regulations,  
21 codes, bills and action plans. While action plans and bills may never become law, they signify  
22 organizational and legislative intent, respectively, of federal and provincial governments. We  
23 combined legislation targeting the built environment (e.g., roads, buildings, infrastructure, and  
24 parks; human-made landscape; preservation of the natural environment for the purpose of  
25 recreation) and physical activity (e.g., physical education standards, child fitness tax credits)  
26 because improving the built environment also improves opportunities for physical activity.<sup>29</sup> A  
27 ‘general’ category comprised broad CDP and health promotion legislation, which made no specific  
28 reference to the three risk factors.<sup>28</sup> Two coders with backgrounds in law and public health,  
29 respectively, independently extracted the characteristics from the text of each legislative  
30 document, using a set of coding rules developed by the legal coder (JM) in consultation with the  
31  
32  
33  
34  
35  
36  
37  
38  
39  
40  
41  
42  
43  
44  
45  
46  
47  
48  
49  
50  
51  
52  
53  
54  
55  
56  
57  
58  
59  
60

1  
2  
3 senior authors (KM, TB). We calculated percentage agreement and  $\kappa$  coefficients for each coding  
4 category (agreement > 90%;  $\kappa > 0.90$ ). Coding disagreements generally arose from texts with vague  
5 terminology or inconsistent use of terms. Where there was disagreement, we used the results of  
6 the legal coder (JM).  
7  
8  
9  
10  
11  
12  
13

### 14 ***Legislative Characteristics***

15  
16 We distinguished whether the primary or secondary purpose of the legislation was related to CDP  
17 or health promotion. For example, Prince Edward Island's *Smoke-free Places Act*<sup>i</sup> has a primary  
18 CDP purpose; its main purpose is to reduce tobacco use and exposure. Further distinction was  
19 made to categorize the intent of the legislation as explicit vs. implicit based on whether the primary  
20 purpose was stated or implied. Alberta's *Child Care Licensing Act*<sup>ii</sup> has CDP as a secondary  
21 purpose; its primary purpose is the licensing and regulation of day care centres with provisions  
22 that may stipulate the serving of healthy foods and/or the prohibition of smoking on daycare  
23 premises. We coded legislation that did not mention CDP or health promotion as having no CDP  
24 purpose. For example, the purpose of the Canada's *National Dairy Code*<sup>iii</sup> is to regulate the safe  
25 production and processing of dairy products with no reduction targets for trans-fat or sodium  
26 relevant to CDP.  
27  
28  
29  
30  
31  
32  
33  
34  
35  
36  
37  
38  
39  
40  
41  
42  
43

44 We developed a coding scheme for the assessment of tools or means through which the legislation  
45 accomplished its purpose based on Gostin's criteria that comprise: (1) tax and spend (impose taxes,  
46 provide tax credits or exemptions); (2) direct regulation (directly impose restrictions on individuals  
47 and business, such as prohibitions and licensing); (3) indirect regulation through the tort system;  
48 (4) de-regulation (repeal of legislative provisions that dis-incentivise desired public health  
49  
50  
51  
52  
53  
54  
55  
56  
57  
58  
59  
60

1  
2  
3 behaviors); (5) delegation of regulation to a public administrative body (e.g., school boards); (6)  
4 alter informational environment (product labeling, instructions for safe use, disclosure of  
5 ingredients or health warnings, limits on harmful or misleading advertising); (7) alter the built  
6 environment (grant ability to alter or regulate the built environment or what individuals can do  
7 with the built environment); and (8) alter socio-economic environment (improve health by  
8 targeting social or economic resources to the benefit of disadvantaged populations).<sup>30</sup>  
9  
10  
11  
12  
13  
14  
15  
16  
17  
18

19 We determined the responsible ministry from the legislation or from public government websites.  
20 The responsibility for the legislation, including amendments and enactment of regulations, may be  
21 the same as, or distinct from, administrative responsibility, which may be delegated to public  
22 bodies (captured under the coding of tools). We assigned a categorical name to each ministry  
23 according to the most common name in use across Canadian jurisdictions (e.g., Ministry of  
24 Health). We assessed the target location for the application of the legislation from the text, or  
25 inferred it from the content and purpose of the legislation.<sup>cf.iv</sup>  
26  
27  
28  
29  
30  
31  
32  
33  
34  
35  
36  
37

38 We assigned a level of coerciveness based on the Nuffield Council's public health policy  
39 intervention ladder, which comprises eight levels from least to most coercive or restrictive of  
40 individual rights: (1) do nothing or simply monitor the situation; (2) provide information (inform  
41 and educate people); (3) enable choice (support behavior change); (4) guide choices by changing  
42 the default option (make "healthier" choices the default); (5) guide choice through incentives  
43 (financial and other incentives to guide people to pursue healthy activities); (6) guide choice  
44 through disincentives (financial and other disincentives to guide people not to pursue unhealthy  
45  
46  
47  
48  
49  
50  
51  
52  
53  
54  
55  
56  
57  
58  
59  
60

1  
2  
3 activities); (7) restrict choice (regulate to restrict the options available); and (8) eliminate choice  
4  
5 (regulate to eliminate the choice entirely).<sup>31</sup>  
6  
7

8  
9  
10 We assessed whether the legislation included enforcement provisions (e.g., appointment and duties  
11  
12 of officers and inspectors, or powers of audit, search, seizure or inspection) and specified  
13  
14 conditions for an offence or penalty: in the legislation itself; in the enacting legislation of  
15  
16 regulations; or under another piece of legislation.<sup>cf.v</sup>  
17  
18  
19

## 20 21 **RESULTS**

22  
23 We identified 786 pieces of legislation that met our inclusion criteria (Table 1). Most tobacco  
24  
25 control legislation had a primary CDP purpose, about one-third had a secondary CDP purpose, and  
26  
27 only 2% had no CDP purpose (Table 2). Half of legislation targeting physical activity or the built  
28  
29 environment had a secondary CDP purpose, one-third had a primary CDP purpose, and the  
30  
31 remainder had no CDP purpose. In contrast, about two-thirds of legislation targeting healthy eating  
32  
33 had no CDP purpose, one-fifth had a secondary CDP purpose, and less than one-fifth had a primary  
34  
35 CDP purpose.  
36  
37  
38  
39

40  
41  
42 The majority of tobacco control legislation used ‘direct regulation’ to accomplish its purpose,  
43  
44 followed by ‘tax & spend’ and ‘alter informational environment’, ‘indirect regulation’, and  
45  
46 ‘regulation through a public body’ (Table 2). In contrast, ‘altering built environment’ was the most  
47  
48 common tool used in legislation targeting physical activity or the built environment, followed by  
49  
50 ‘regulation through a public body’, ‘tax & spend’, and ‘direct regulation’. The legislation targeting  
51  
52  
53  
54  
55  
56  
57  
58  
59  
60

1  
2  
3 healthy eating used ‘direct regulation’, ‘regulation through a public body’, and ‘alter informational  
4 environment’.  
5  
6  
7  
8  
9

10 Most often, the ministry of health held legislative responsibility for tobacco control legislation,  
11 followed by finance and justice (Table 3). For physical activity legislation, the ministry of  
12 environment most commonly held legislative responsibility, followed by municipalities, culture,  
13 and education. The ministries of education and health were most often responsible for legislation  
14 targeting healthy eating. In terms of settings where the legislation applied, workplaces, public  
15 transit, enclosed public spaces, and schools were most often protected by tobacco control  
16 legislation. Municipalities were most often covered by physical activity legislation, followed by  
17 outdoor non-urban spaces and schools. Finally, healthy eating legislation targeted schools, child  
18 care facilities and food establishments.  
19  
20  
21  
22  
23  
24  
25  
26  
27  
28  
29  
30  
31  
32

33 Tobacco control legislation was most restrictive of individual rights, compared to legislation  
34 targeting other risk factors across all time periods (Figure 1). It most commonly eliminated or  
35 restricted choice, and its coerciveness increased gradually between 1980 and 2017, with one-third  
36 and two-thirds of legislation either eliminating choice or restricting choice, respectively.  
37  
38  
39  
40  
41  
42 Conversely, most legislation targeting physical activity or the built environment enabled choice or  
43 guided choice through changing the default policy. Legislation targeting healthy eating was least  
44 coercive.  
45  
46  
47  
48  
49  
50

51 Finally, the majority of tobacco control legislation included provisions for enforcement and  
52 specified conditions for an offence or penalty using the three mechanisms to do so (i.e., in  
53  
54  
55  
56  
57  
58  
59  
60



1  
2  
3 legislation, via delegated authority, in other legislation). In contrast, about two-fifths of physical  
4 activity and one-fifth of healthy eating legislation included such provisions (Table 4). In addition,  
5  
6 most laws targeting tobacco control and physical activity specified an offence and/or penalty either  
7  
8 in the legislation itself or in the enabling legislation of regulations; only one-fifth of healthy eating  
9  
10 legislation did so.  
11  
12  
13  
14  
15  
16

## 17 **DISCUSSION**

18  
19 Three key findings emerge from our systematic characterization of 786 Canadian federal and  
20 provincial laws that target CDP and health promotion: tobacco use, physical activity and healthy  
21 eating. First, these laws are diverse in terms of their purpose, tools to accomplish their purpose,  
22 responsible authority, target location, level of coerciveness, and enforcement. Second, while the  
23 majority of tobacco control legislation passed in Canada since the 1980s had a primary goal of  
24 improving behaviours (i.e., reducing tobacco use) and CDP, only a minority of legislation targeting  
25 physical activity and healthy eating had similar primary goals. Third, the restrictiveness of tobacco  
26 control legislation has increased gradually since 1980. Although the level of coerciveness in  
27 legislation that targets physical activity and healthy eating appears to have increased since 2010,  
28 legislative approaches in these areas lag behind tobacco control. Rather than coercion, these laws  
29 promote exchange of best practices and adoption of self-regulatory standards by industry.  
30  
31  
32  
33  
34  
35  
36  
37  
38  
39  
40  
41  
42  
43  
44  
45  
46

47 The central role of public regulatory approaches within national and international CDP strategies  
48 recognizes governments as key stakeholders in the development of policy frameworks to create  
49 health-supporting environments.<sup>6-8</sup> The WHO FCTC has been a catalyst and a powerful legal  
50 instrument to promote implementation of strong regulatory approaches aimed at reducing the  
51  
52  
53  
54  
55  
56  
57  
58  
59  
60

1  
2  
3 prevalence of tobacco use and exposure to tobacco smoke. Recent assessments of global tobacco  
4 control policies report a significant increase in highest-level implementation of all key demand-  
5 reduction measures of the WHO FCTC and provide convincing evidence that these approaches led  
6 to considerable reductions in tobacco use and other tobacco-related outcomes.<sup>17-18</sup> Implementation  
7 of a comprehensive package, consisting of a combination of interventions and policies, particularly  
8 higher taxes and smoke-free environment legislation, is critical for accelerating action.<sup>12-13</sup>  
9  
10  
11  
12  
13  
14  
15  
16  
17  
18

19 Corroborating emerging international evidence, our study demonstrates that softer approaches for  
20 improving diet and activity levels are preferred in Canadian legislation. A systematic assessment  
21 of US state-level childhood obesity prevention legislation adopted in 2003-2005 found that the  
22 likelihood of bill enactment for bills using softer tools (e.g., school nutrition standards,  
23 walking/biking trails, safe routes to school) was higher compared to bills with stronger tools (e.g.,  
24 snack and soda taxes, menu and product labelling).<sup>22</sup> A systematic review of legislation targeting  
25 dietary risk factors enacted in the US and the European Union since 2004 similarly highlighted the  
26 limited scope of the legislation, with provision of information to consumers preferred over taxation  
27 and marketing restrictions.<sup>23</sup> Research in support of stronger legislative and regulatory approaches  
28 for improving diet and activity levels is burgeoning. US studies suggest that a ban on television  
29 advertising of unhealthy foods high in sugar, fat and/or salt is associated with an estimated 20.5%  
30 decline in overweight/obesity in children.<sup>32-33</sup> In Canada, the body mass index (BMI) of school  
31 children declined by 0.05 kg/m<sup>2</sup> each year after introducing a ban on junk food sales on school  
32 property in six provinces, translating into a decline of almost 1 kg after five or more years.<sup>27</sup> The  
33 nutritional profile of food/beverage advertised to children on television was found to be healthier  
34 in Quebec, which bans advertising to children under age 13,<sup>vi</sup> compared to Ontario where  
35  
36  
37  
38  
39  
40  
41  
42  
43  
44  
45  
46  
47  
48  
49  
50  
51  
52  
53  
54  
55  
56  
57  
58  
59  
60

1  
2  
3 advertising is self-regulated by industry.<sup>24</sup> Yet, the Quebec advertising ban does little to limit the  
4 amount of food/beverage advertising during children's prime television viewing time, highlighting  
5 the need for monitoring and enforcement.<sup>25-26</sup> Our results also demonstrate that only a minority of  
6 healthy eating and physical activity laws in Canada include provisions for monitoring and  
7 enforcement.  
8  
9

10  
11  
12  
13  
14  
15  
16  
17 Although the CPAC PPD is comprehensive, some laws may not have been captured. We excluded  
18 municipal by-laws, government policy documents and policy evaluations because our intent was  
19 to identify issues and responses significant enough to be enshrined in federal or provincial laws,  
20 considered by the legislative bodies of Parliament and Legislatures, respectively. However,  
21 addition of 325 by-laws from across Canada to our analysis did not change the findings (data not  
22 shown). Capturing administrative responsibility was challenging since this information was  
23 extracted from the legislation text and publicly accessible government websites. Nonetheless, the  
24 analysis showed that responsibility lies across several ministries. Lastly, we studied characteristics  
25 of the legislation as it exists "on the books" and not in practice.  
26  
27  
28  
29  
30  
31  
32  
33  
34  
35  
36  
37  
38  
39

40 This is the first systematic assessment of Canadian legislation targeting behavioural risk factors  
41 for chronic disease, providing a baseline for building consensus on using law to reduce disease  
42 burden. Overall, there is a substantial lag in utilizing stronger legislative approaches to promote  
43 physical activity and healthy eating, underscoring missed opportunities to impact health behaviour  
44 through regulatory interventions.<sup>34</sup> Collectively, our findings underscore the need for improving  
45 capacity in the public health system<sup>35</sup> to develop and implement a diverse and comprehensive set  
46 of CDP laws that are evidence-based, well-designed and appropriately targeted. Despite national  
47  
48  
49  
50  
51  
52  
53  
54  
55  
56  
57  
58  
59  
60

1  
2  
3  
4  
5  
6  
7  
8  
9  
10  
11  
12  
13  
14  
15  
16  
17  
18  
19  
20  
21  
22  
23  
24  
25  
26  
27  
28  
29  
30  
31  
32  
33  
34  
35  
36  
37  
38  
39  
40  
41  
42  
43  
44  
45  
46  
47  
48  
49  
50  
51  
52  
53  
54  
55  
56  
57  
58  
59  
60

and international commitments to accelerate action on CDP, Canadian public health efforts to enact new laws or to inject CDP-relevant information into existing laws, continue to face substantial challenges that thwart the creation of optimally health-supportive environments.

Confidential

## REFERENCES

1. Magnusson R, Patterson D. Role of law in global response to non-communicable diseases. *Lancet*. 2011;378(9794):859-60.
2. Advancing the right to health: the vital role of law. Geneva: World Health Organization; 2017. ([https://www.who.int/healthsystems/topics/health-law/health\\_law-report/en/](https://www.who.int/healthsystems/topics/health-law/health_law-report/en/))
3. Gostin LO. Law as a tool to facilitate healthier lifestyles and prevent obesity. *The Journal of the American Medical Association (JAMA)*. 2007;297(1):87-90.
4. Cecchini M, Sassi F, Lauer J, Lee YY, Guajardo-Barron V, Chisholm D. Tackling of unhealthy diets, physical inactivity, and obesity: health effects and cost-effectiveness. *Lancet*. 2010;376(9754):1775-84.
5. Gostin LO. Legal and public policy interventions to advance the population's health. In: Institute of Medicine, Division of Health Promotion and Disease Prevention; Smedley BD and Syme SL (Eds.). *Promoting health: intervention strategies from social and behavioral research* (pp. 390-416). Washington, DC: The National Academies Press; 2000.
6. Global Action Plan for the Prevention and Control of Noncommunicable Diseases 2013-2020. Geneva: World Health Organization; 2013. ([https://www.who.int/nmh/events/ncd\\_action\\_plan/en/](https://www.who.int/nmh/events/ncd_action_plan/en/))
7. Time to deliver: report of the WHO Independent High-level Commission on Noncommunicable Diseases. Geneva: World Health Organization; 2018. (<https://apps.who.int/iris/handle/10665/272710>)
8. Political declaration of the third high-level meeting of the General Assembly on the prevention and control of non-communicable diseases. New York, NY: United Nations; 2011. ([http://www.un.org/en/ga/search/view\\_doc.asp?symbol=A/RES/73/2](http://www.un.org/en/ga/search/view_doc.asp?symbol=A/RES/73/2))
9. How Healthy are Canadians? A trend analysis of the health of Canadians from a healthy living and chronic disease perspective. Ottawa (ON): Public Health Agency of Canada; 2017. (<https://www.canada.ca/en/public-health/services/publications/healthy-living/how-healthy-canadians.html>)
10. Strong foundation, Renewed Focus: An Overview of Canada's Federal Tobacco Control Strategy 2012-2017. Ottawa, ON: Her Majesty the Queen in Right of Canada, represented by the Minister of Health; 2012. (<https://www.canada.ca/en/health-canada/services/publications/healthy-living/strong-foundation-renewed-focus-overview-canada-federal-tobacco-control-strategy-2012-17.html>)
11. World Health Organization Framework Convention on Tobacco Control (WHO FCTC). Geneva: World Health Organization; 2003. ([https://www.who.int/fctc/text\\_download/en/](https://www.who.int/fctc/text_download/en/))
12. Yach D, McKee M, Lopez AD, Novotny T. Improving diet and physical activity: 12 lessons from controlling tobacco smoking. *British Medical Journal*. 2005;330(7496):898-900.
13. Blouin C, Dubé L. Global health diplomacy for obesity prevention: lessons from tobacco control. *Journal of Public Health Policy*. 2010;31(2):244-55.
14. Asbridge M. Public place restrictions on smoking in Canada: assessing the role of the state, media, science and public health advocacy. *Social Science & Medicine*. 2004;58(1):13-24.
15. Nykiforuk CI, Eyles J, Campbell HS. Smoke-free spaces over time: a policy diffusion study of bylaw development in Alberta and Ontario, Canada. *Health & Social Care in the*

- Community. 2008;16(1):64-74.
16. Eriksen MP, Cerak RL. The diffusion and impact of clean indoor air laws. *Annual Review of Public Health*. 2008;29:171-185.
  17. Gravely S, Giovino GA, Craig LV, Commar A, d'Espaignet ET, Schotte K, Fong GT. Implementation of key demand-reduction measures of the WHO Framework Convention on Tobacco Control and change in smoking prevalence in 126 countries: an association study. *Lancet Public Health*. 2017;2(4):e166-e174.
  18. Chung-Hall J, Craig L, Gravely S, Sansone N, Fong GT. Impact of the WHO FCTC over the first decade: a global evidence review prepared for the Impact Assessment Expert Group. *Tobacco Control*. 2018;doi:10.1136/tobaccocontrol-2018-054389.
  19. Eyler AA, Budd E, Camberos GJ, Yan Y, Brownson RC. State legislation related to increasing physical activity: 2006-2012. *Journal of Physical Activity and Health*. 2016;13(2):207-213.
  20. Cawley J, Liu F. Correlates of state legislative action to prevent childhood obesity. *Obesity*. 2008;16(1):162-167.
  21. Monnat SM, Lounsbery MAF, Smith NJ. Correlates of state enactment of elementary school physical education laws. *Preventive Medicine* 2013; 69: S5-S11.
  22. Boehmer TK, Luke DA, Haire-Joshu DL, Bates HS, Brownson RC. Preventing childhood obesity through state policy predictors of bill enactment. *American Journal of Preventive Medicine*. 2008;34(4):333-340.
  23. Sisnowski J, Handsley E, Street JM. Regulatory approaches to obesity prevention: a systematic overview of current laws addressing diet-related risk factors in the European Union and the United States. *Health Policy*. 2015;119(6):720-31.
  24. Potvin Kent M, Dubois L, Wanless A. A nutritional comparison of foods and beverages marketed to children in two advertising policy environments. *Obesity*. 2012;20(9):1829-37.
  25. Potvin Kent M, Dubois L, Wanless A. Self-regulation by industry of food marketing is having little impact during children's preferred television. *Pediatric Obesity*. 2011;6(5-6):401-8.
  26. Potvin Kent M, Dubois L, Wanless A. Food marketing on children's television in two different policy environments. *International Journal of Pediatric Obesity*. 2011;6(S3):e433-441.
  27. Leonard PS. Do school junk food bans improve student health? Evidence from Canada. *Canadian Public Policy*. 2017;43(2):105-19.
  28. Politis CE, Halligan MH, Keen D, Kerner JF. Supporting the diffusion of healthy public policy in Canada: the Prevention Policies Directory. *Online Journal of Public Health Informatics*. 2014;6(2):e177.
  29. Sallis JF, Bauman A, Pratt M. Environmental and policy interventions to promote physical activity. *American Journal of Preventive Medicine*. 1998;15(4):379-97.
  30. Gostin LO. *Public Health Law*. Los Angeles, CA: University of California Press; 2008.
  31. *Public health: ethical issues*. London, UK: Nuffield Council on Bioethics; 2007. (<http://nuffieldbioethics.org/wp-content/uploads/2014/07/Public-health-ethical-issues.pdf>)
  32. Chou S-Y, Rashad I, Grossman M. Fast-food restaurant advertising on television and its influence on childhood obesity. *The Journal of Law and Economics* 2008;51(4):599-618.

- 1  
2  
3 33. Veerman JL, Van Beeck EF, Barendregt JJ, Mackenbach JP. By how much would limiting  
4 TV food advertising reduce childhood obesity? *European Journal of Public Health*.  
5 2009;19(4):365-369.  
6  
7 34. Ries NM, von Tigerstrom B. Roadblocks to laws for healthy eating and activity. *Canadian*  
8 *Medical Association Journal*. 2010;182(7):687-92.  
9  
10 35. Hanusaik N, Sabiston CM, Kishchuk N, Maximova K, O'Loughlin J. Association between  
11 organizational capacity and involvement in chronic disease prevention programming among  
12 Canadian public health organizations. *Health Education Research*. 2014;30(2):206-22.  
13  
14

15 **Legislation referenced subsection:**

- 16 i. *Smoke-free Places Act*, RSPEI 1988, c S-4.2, <<http://canlii.ca/t/538zc>> retrieved on 2019-  
17 02-19.  
18 ii. *Child Care Licensing Act*, SA 2007, c C-10.5, <<http://canlii.ca/t/52vn4>> retrieved on 2019-  
19 02-19.  
20 iii. *National Dairy Code*. Available at:  
21 [http://www.dairyinfo.gc.ca/pdf/dairy\\_code\\_sept\\_2015\\_I\\_e.pdf](http://www.dairyinfo.gc.ca/pdf/dairy_code_sept_2015_I_e.pdf)  
22 iv. *Education Act*, SS 1995, c E-0.2, <<http://canlii.ca/t/533q2>> retrieved on 2019-02-19.  
23 v. *Offence Act*, RSBC 1996, c 338, <<http://canlii.ca/t/533tx>> retrieved on 2019-02-19.  
24 vi. *Consumer Protection Act*, CQLR c P-40.1, <<http://canlii.ca/t/53h79>> retrieved on 2019-02-  
25 22.  
26  
27  
28  
29  
30  
31  
32  
33  
34  
35  
36  
37  
38  
39  
40  
41  
42  
43  
44  
45  
46  
47  
48  
49  
50  
51  
52  
53  
54  
55  
56  
57  
58  
59  
60

Table 1. Legislation type by targeted risk factor

|             | Tobacco Control<br>(n=195) | Physical Activity<br>(n=237) | Healthy Eating<br>(n=117) | Multiple<br>factors<br>(n=120) | Total<br>(n=786) |
|-------------|----------------------------|------------------------------|---------------------------|--------------------------------|------------------|
|             | %                          | %                            | %                         | %                              | %                |
| Statute     | 12.9                       | 49.0                         | 35.9                      | 15.8                           | 42.6             |
| Regulation  | 43.1                       | 33.8                         | 40.2                      | 61.7                           | 38.6             |
| Code        | 0.0                        | 0.4                          | 0.0                       | 1.7                            | 0.4              |
| Bill        | 16.9                       | 12.2                         | 17.1                      | 5.0                            | 12.9             |
| Action Plan | 1.5                        | 4.6                          | 6.8                       | 15.8                           | 5.6              |

Notes: Multiple factors refers to legislation targeting more than one risk factor (i.e., tobacco control, physical activity, healthy eating). Total includes 'general' legislation (e.g., provincial Public Health Acts).

Confidential



Table 2. Legislation purpose and tools to accomplish its purpose by targeted risk factor

|                                            | Tobacco<br>Control<br>(n=195) | Physical<br>Activity<br>(n=237) | Healthy<br>Eating<br>(n=117) | Multiple<br>factors<br>(n=120) | Total<br>(n=786) |
|--------------------------------------------|-------------------------------|---------------------------------|------------------------------|--------------------------------|------------------|
|                                            | %                             | %                               | %                            | %                              | %                |
| <b><i>Purpose</i></b>                      |                               |                                 |                              |                                |                  |
| Primary - explicit                         | 5.6                           | 8.4                             | 2.6                          | 6.7                            | 5.5              |
| Primary - implicit                         | 62.6                          | 21.5                            | 15.4                         | 9.2                            | 26.1             |
| Secondary                                  | 29.2                          | 49.8                            | 20.5                         | 71.7                           | 41.4             |
| No purpose                                 | 2.1                           | 19.4                            | 61.5                         | 10.0                           | 26.3             |
| <b><i>Tools to accomplish purpose*</i></b> |                               |                                 |                              |                                |                  |
| Tax & spend                                | 16.9                          | 19.0                            | 5.1                          | 15.0                           | 13.5             |
| Direct regulation                          | 76.4                          | 12.7                            | 16.2                         | 60.8                           | 35.2             |
| Indirect regulation                        | 8.7                           | 0.0                             | 0.0                          | 0.0                            | 2.2              |
| De-regulation                              | 0.0                           | 0.0                             | 0.0                          | 0.0                            | 0.0              |
| Regulation through a public body           | 8.7                           | 27.9                            | 12.0                         | 8.3                            | 17.9             |
| Alter informational environment            | 16.4                          | 1.3                             | 6.8                          | 5.0                            | 6.5              |
| Alter built environment                    | 1.5                           | 54.0                            | 0.0                          | 42.5                           | 25.6             |
| Alter socio-economic environment           | 0.5                           | 2.1                             | 2.6                          | 5.0                            | 1.9              |

Notes: Multiple factors refers to legislation targeting more than one risk factor (i.e., tobacco control, physical activity, healthy eating). Total includes 'general' legislation (e.g., provincial Public Health Acts).

\* Tax and spend (imposing taxes, providing tax credits or exemptions); direct regulation (directly imposing restrictions on individuals and business, such as prohibitions and licensing); indirect regulation through tort (granting causes of action in tort to the government or others); de-regulation (repealing other pieces of legislation to dismantle legal barriers to desired public health behaviors); regulation through a public body (empowering a public or administrative body (e.g., school boards) to act and setting its duties); alter informational environment (product labelling, instructions for safe use, disclosing ingredients or health warnings, limiting harmful or misleading advertising); alter built environment (granting ability to alter or regulate the built environment or what individuals can do with the built environment); and alter socio-economic environment (improving health by targeting disadvantaged social or economic resources).<sup>30</sup>

Table 3. Ministry responsible for legislation and target location by targeted risk factor

|                               | Tobacco<br>Control<br>(n=195)<br>% | Physical<br>Activity<br>(n=237)<br>% | Healthy<br>Eating<br>(n=117)<br>% | Multiple<br>factors<br>(n=120)<br>% | Total<br>(n=786)<br>% |
|-------------------------------|------------------------------------|--------------------------------------|-----------------------------------|-------------------------------------|-----------------------|
| <b>Ministry responsible</b>   |                                    |                                      |                                   |                                     |                       |
| Health                        | 44.1                               | 0.4                                  | 9.4                               | 25.0                                | 17.4                  |
| Finance                       | 27.7                               | 5.5                                  | 3.4                               | 5.8                                 | 9.9                   |
| Municipal                     | 0.0                                | 17.7                                 | 0.0                               | 5.8                                 | 8.3                   |
| Environment                   | 0.0                                | 23.2                                 | 0.0                               | 5.8                                 | 7.9                   |
| Education                     | 1.5                                | 6.8                                  | 10.3                              | 4.2                                 | 5.2                   |
| Social services               | 0.0                                | 2.1                                  | 5.6                               | 15.0                                | 4.3                   |
| Justice                       | 12.3                               | 0.4                                  | 0.9                               | 0.8                                 | 3.6                   |
| Culture                       | 0.0                                | 8.0                                  | 0.0                               | 7.5                                 | 3.6                   |
| Transportation                | 5.1                                | 3.4                                  | 0.0                               | 2.5                                 | 2.8                   |
| Agriculture                   | 1.0                                | 0.4                                  | 2.6                               | 11.7                                | 2.5                   |
| Development                   | 0.5                                | 5.5                                  | 0.0                               | 0.8                                 | 1.9                   |
| Employment/labour             | 5.1                                | 0.0                                  | 0.0                               | 1.7                                 | 1.5                   |
| <b>Target location</b>        |                                    |                                      |                                   |                                     |                       |
| Municipalities                | 4.1                                | 26.6                                 | 0.0                               | 15.0                                | 13.5                  |
| Schools                       | 16.9                               | 6.3                                  | 11.1                              | 5.8                                 | 9.2                   |
| Public transit                | 20.5                               | 5.9                                  | 0.9                               | 8.3                                 | 8.5                   |
| Outdoor non-urban spaces      | 0.5                                | 20.7                                 | 0.0                               | 7.5                                 | 7.5                   |
| Food establishments           | 12.8                               | 0.0                                  | 4.3                               | 20.8                                | 7.0                   |
| Child care facilities         | 7.7                                | 0.8                                  | 5.1                               | 20.0                                | 6.4                   |
| Workplaces                    | 21.5                               | 0.4                                  | 0.9                               | 2.5                                 | 6.0                   |
| Long term care facilities     | 11.8                               | 0.0                                  | 4.3                               | 12.5                                | 5.7                   |
| Recreation & sport facilities | 11.8                               | 3.8                                  | 0.0                               | 5.8                                 | 5.1                   |
| Enclosed public spaces        | 18.0                               | 0.0                                  | 0.0                               | 0.0                                 | 4.6                   |
| Hospitals                     | 14.4                               | 0.0                                  | 0.0                               | 0.8                                 | 3.8                   |
| Universities                  | 9.2                                | 2.5                                  | 1.7                               | 0.8                                 | 3.4                   |
| Pharmacies                    | 7.2                                | 0.0                                  | 0.0                               | 0.0                                 | 2.0                   |

Notes: Multiple factors refers to legislation targeting more than one risk factor (i.e., tobacco control, physical activity, healthy eating). Total includes 'general' legislation (e.g., provincial Public Health Acts).

Table 4. Legislation enforcement by targeted risk factor

|                                            | Tobacco<br>Control<br>(n=195)<br>% | Physical<br>Activity<br>(n=237)<br>% | Healthy<br>Eating<br>(n=117)<br>% | Multiple<br>factors<br>(n=120)<br>% | Total<br>(n=786)<br>% |
|--------------------------------------------|------------------------------------|--------------------------------------|-----------------------------------|-------------------------------------|-----------------------|
| <b><i>Provision specified</i></b>          |                                    |                                      |                                   |                                     |                       |
| In legislation itself                      | 33.9                               | 28.3                                 | 10.3                              | 17.5                                | 24.1                  |
| In enacting or other legislation           | 49.7                               | 14.8                                 | 11.1                              | 38.3                                | 24.8                  |
| <b><i>Offence or penalty specified</i></b> |                                    |                                      |                                   |                                     |                       |
| In legislation itself                      | 37.4                               | 30.0                                 | 12.0                              | 5.8                                 | 23.5                  |
| In enacting or other legislation           | 47.2                               | 44.7                                 | 10.3                              | 50.0                                | 25.8                  |

Notes: Multiple factors refers to legislation targeting more than one risk factor (i.e., tobacco control, physical activity, healthy eating). Total includes 'general' legislation (e.g., provincial Public Health Acts).

Figure 1. Legislation coerciveness between 1980 and 2017 by targeted risk factor

## Figure legend:

Based on the Nuffield Council's public health policy intervention ladder,<sup>31</sup> which consists of eight levels: do nothing or simply monitor the situation; provide information (inform and educate people (e.g., health warnings, nutrition labels)); enable choice (enable people to change their behaviours); guide choices through changing the default (make "healthier" choices the default option); guide choice through incentives (financial and other incentives to guide people to pursue certain activities); guide choice through disincentives (financial and other disincentives to guide people to influence people to not pursue certain activities); restrict choice (regulate to restrict the options available to people); and eliminate choice (regulate to eliminate choice entirely).

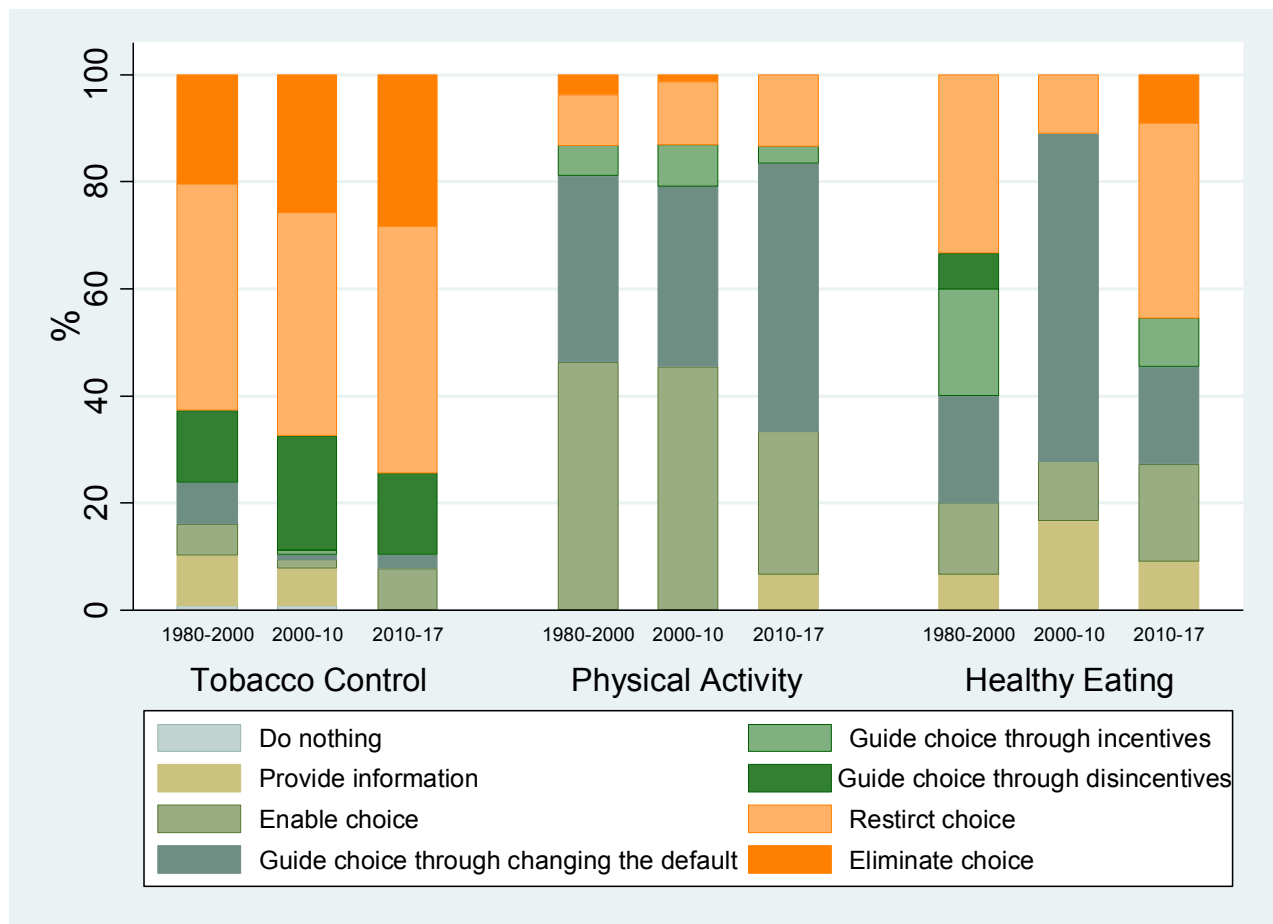

## ANNEX

Annex Table 1: Distribution of legislation by province and risk factors

|                         | Tobacco Control<br>(n=195) | Physical Activity<br>(n=237) | Healthy Eating<br>(n=117) | Multiple factors<br>(n=120) | Total<br>(n=786) |
|-------------------------|----------------------------|------------------------------|---------------------------|-----------------------------|------------------|
|                         | n (%)                      | n (%)                        | n (%)                     | n (%)                       | n (%)            |
| Newfoundland & Labrador | 18 (9.2)                   | 11 (4.6)                     | 2 (1.7)                   | 5 (4.2)                     | 41 (5.2)         |
| Prince Edward Island    | 11 (5.6)                   | 10 (4.2)                     | 2 (1.7)                   | 6 (5.0)                     | 34 (4.3)         |
| Nova Scotia             | 17 (8.7)                   | 20 (8.4)                     | 8 (6.8)                   | 11 (9.2)                    | 67 (8.5)         |
| New Brunswick           | 11 (5.6)                   | 13 (5.5)                     | 5 (4.3)                   | 6 (5.0)                     | 45 (5.7)         |
| Quebec                  | 11 (5.6)                   | 16 (6.8)                     | 8 (6.8)                   | 12 (10.0)                   | 57 (7.3)         |
| Ontario                 | 24 (12.3)                  | 59 (24.9)                    | 29 (24.8)                 | 18 (15.0)                   | 139 (17.7)       |
| Manitoba                | 21 (10.8)                  | 20 (8.4)                     | 13 (11.0)                 | 11 (9.2)                    | 79 (10.0)        |
| Saskatchewan            | 9 (4.6)                    | 22 (9.3)                     | 9 (7.7)                   | 10 (8.3)                    | 62 (8.0)         |
| Alberta                 | 17 (8.7)                   | 18 (7.6)                     | 10 (8.5)                  | 9 (7.5)                     | 63 (8.0)         |
| British Columbia        | 13 (6.7)                   | 27 (11.4)                    | 13 (11.0)                 | 9 (7.5)                     | 71 (9.0)         |
| Northwest Territories   | 13 (6.7)                   | 6 (2.5)                      | 2 (1.7)                   | 4 (3.3)                     | 35 (4.5)         |
| Nunavut                 | 6 (3.0)                    | 5 (2.1)                      | 1 (0.8)                   | 3 (2.5)                     | 20 (2.5)         |
| Yukon                   | 7 (3.6)                    | 4 (1.7)                      | 3 (2.6)                   | 6 (5.0)                     | 25 (3.2)         |
| Canada                  | 17 (8.7)                   | 6 (2.5)                      | 12 (10.3)                 | 10 (8.3)                    | 48 (6.0)         |

Notes: Multiple factors refers to legislation targeting more than one risk factor (i.e., tobacco control, physical activity, healthy eating). Total includes 'general' legislation (e.g., provincial Public Health Acts).

Annex Table 2: Condensed primary purposes of the legislation by risk factors

|                                                        | Tobacco Control<br>(n=195) | Physical Activity<br>(n=237) | Healthy Eating<br>(n=117) | Multiple factors<br>(n=120) | Total<br>(n=786) |
|--------------------------------------------------------|----------------------------|------------------------------|---------------------------|-----------------------------|------------------|
|                                                        | n (%)                      | n (%)                        | n (%)                     | n (%)                       | n (%)            |
| First Nation & Metis Agreement enactment & enforcement | -                          | -                            | 1 (0.9)                   | -                           | 5 (0.6)          |
| Criminal Justice                                       | 4 (2.1)                    | 1 (0.4)                      | -                         | 1 (0.8)                     | 6 (0.8)          |
| General Government Regulation                          | 3 (1.5)                    | 5 (2.1)                      | 1 (0.9)                   | -                           | 16 (2.0)         |
| Long Term Care facilities operation regulation         | -                          | -                            | 4 (3.4)                   | <b>15 (12.5)</b>            | 20 (2.5)         |
| Education system oversight                             | 2 (1.0)                    | <b>14 (5.9)</b>              | 3 (2.6)                   | -                           | 25 (3.2)         |
| Promoting healthy eating                               | -                          | -                            | <b>20 (17.1)</b>          | <b>6 (5.0)</b>              | 27 (3.4)         |
| Child care operation regulation                        | -                          | 2 (0.8)                      | <b>6 (5.1)</b>            | <b>21 (17.5)</b>            | 33 (4.2)         |
| Transportation System Regulation                       | <b>11 (5.6)</b>            | <b>14 (5.9)</b>              | -                         | <b>9 (7.5)</b>              | 34 (4.3)         |
| General Health & Safety                                | 8 (4.1)                    | <b>18 (7.6)</b>              | 3 (2.6)                   | <b>7 (5.8)</b>              | 37 (4.7)         |
| Municipal Empowerment and regulation                   | -                          | <b>18 (7.6)</b>              | 1 (0.9)                   | -                           | 41 (5.2)         |
| Creating, modify & regulating built environment for PA | -                          | <b>32 (13.5)</b>             | -                         | <b>9 (7.5)</b>              | 41 (5.2)         |
| Food and Drug Safety                                   | 3 (1.5)                    | -                            | <b>15 (12.8)</b>          | <b>22 (18.3)</b>            | 46 (5.9)         |
| Promoting physical activity                            | -                          | <b>31 (13.1)</b>             | 1 (0.9)                   | <b>13 (10.8)</b>            | 49 (6.2)         |
| Planning, Development & Land Use                       | 3 (1.5)                    | <b>37 (15.6)</b>             | -                         | <b>9 (7.5)</b>              | 50 (6.4)         |
| Financial Regulation                                   | <b>26 (13.3)</b>           | <b>16 (6.8)</b>              | 4 (3.4)                   | 5 (4.2)                     | 51 (6.5)         |
| Environmental, Natural Resource & Parks Regulation     | -                          | <b>48 (20.3)</b>             | -                         | <b>9 (7.5)</b>              | 58 (7.4)         |
| General Public Health regulation                       | 1 (0.5)                    | -                            | 2 (1.7)                   | 1 (0.8)                     | 70 (8.9)         |
| Food Industry Regulation                               | -                          | -                            | <b>62 (53.0)</b>          | <b>13 (10.8)</b>            | 75 (9.5)         |
| Tobacco Control                                        | <b>133 (68.2)</b>          | -                            | -                         | 2 (1.7)                     | 136 (17.3)       |

Notes: Proportions larger than 5% are in bold. Multiple factors refers to legislation targeting more than one risk factor (i.e., tobacco control, physical activity, healthy eating). Total includes 'general' legislation (e.g., provincial Public Health Acts).
